# Supplementary material
Source: HighWire-hosted journal article supplement (https://qualitysafety.bmj.com/content/32/7/394)
Supplement: inline-supplementary-material-1 [file inline-supplementary-material-1.pdf]

# **Predictors and population health outcomes of persistent high GP turnover in English general practices: a retrospective observational study**

## Supplementary Material

We used a retrospective observational design using the GP workforce dataset; GP-by-practice data; Hospital Episodes Statistics (HES) data and General Practitioner Patient' Survey (GPPS) data between 2007-2019 and 2009-2017 in England. Practice characteristics and GPs' turnover were obtained from the GP workforce dataset linked to the GP-by-practice data (*GP membership-epracmem*) by practice code and each year. "HES and the GPPS were used to identify population health outcomes. It is noteworthy, information from these datasets was available only at aggregate level."

### Text 1. Data sources

#### GP workforce dataset

NHS Digital regularly publishes workforce datasets which include information on individual GPs and practice level characteristics since 1995. These datasets are publicly available on the NHS Digital website.<sup>1</sup> This study used the annual datasets (September releases) between 2007 and 2020 and the files containing practice-level data containing all the information relative to a practice.<sup>2</sup>

#### Membership of practices

The GPs-by-general practice data (*GP membership-epracmem*), available from the NHS Prescription Data Service (NHS RxS) and published by the NHS Organisation Data Service (ODS) contains information on dates when a GP joins and leaves a GP practice which enables the calculation of GP turnover across a specified time window. These datasets include information only on those GPs who have been allocated an individual prescribing number i.e. GP partners and salaried GPs. These data are published free of charge and capture information on GP membership to each practice from 1974 and are updated weekly on the NHS Technology Reference data Update Distribution (TRUD)<sup>3</sup> website. Data on GP membership of practices were extracted on the second week of November 2020. The GP workforce dataset and GPs-by-practice data were linked following the same process as in Parisi et al., (2021).

#### HES dataset

HES is an administrative record level dataset containing all publicly funded NHS hospital activity in England.<sup>4</sup> The data was primarily collected for commissioning purposes, where hospitals are reimbursed for the activity they provide. Data was extracted from the Accident and Emergency and the Admitted Patient Care (APC) data series between 2009/10 -2017/18 financial years, for HES APC data provider spells were constructed from the patient-episode level data. We obtain the number of non-elective admissions (where the HES APC variable "ADMIMETH" began with the value 2) and A&E attendances for patients registered at each GP practice in England. We had access to an already processed dataset where data were aggregated (specifically, A&E emergency attendances or admissions per 100 registered patients). During the study window 99.5% of practices were merged to HES data."

**GPPS dataset**

The GPPS is a biannual postal survey conducted on behalf of NHS England, which collects patients' views and experiences of the services provided by their practice.<sup>5</sup> We used the surveys published between 2009 and 2017.

**Supplementary Figure 1: Proportion of practices with persistent high turnover by year**

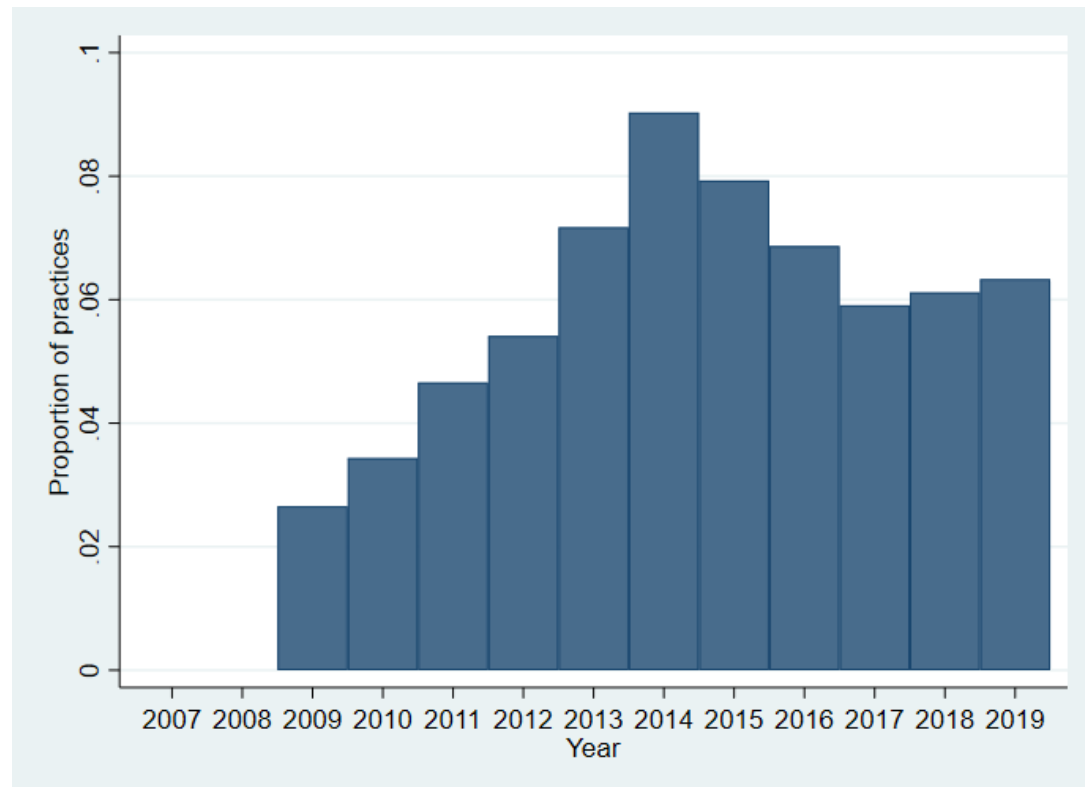

## Statistical analyses

**Supplementary Table 1. Unadjusted analysis of risk factors for persistent high turnover.**

|                                           | <b>OR (95% CI)</b>  | <b>p-value</b> |
|-------------------------------------------|---------------------|----------------|
| <b>IMD 1</b>                              | Reference           |                |
| <b>IMD 2</b>                              | 1.04 (0.88 to 1.23) | 0.661          |
| <b>IMD 3</b>                              | 1.03 (0.87 to 1.22) | 0.720          |
| <b>IMD 4</b>                              | 0.97 (0.82 to 1.16) | 0.764          |
| <b>IMD 5</b>                              | 0.85 (0.71 to 1.01) | 0.063          |
| <b>Listsize 1, (mean; sd) (2528; 592)</b> | 0.14 (0.12 to 0.18) | <0.001         |
| <b>Listsize 2 (4493; 565)</b>             | 0.42 (0.36 to 0.49) | <0.001         |
| <b>Listsize 3 (6532; 649)</b>             | Reference           |                |
| <b>Listsize 4 (9119; 866)</b>             | 1.73 (1.53 to 1.96) | <0.001         |
| <b>Listsize 5 (14291; 4362)</b>           | 2.75 (2.41 to 3.13) | <0.001         |
| <b>NHS London</b>                         | Reference           |                |
| <b>NHS Central Midlands</b>               | 2.28 (1.79 to 2.9)  | <0.001         |
| <b>NHS East Midlands</b>                  | 1.7 (1.32 to 2.18)  | <0.001         |
| <b>NHS North Midlands</b>                 | 1.8 (1.4 to 2.32)   | <0.001         |
| <b>NHS West Midlands</b>                  | 1.03 (0.81 to 1.32) | 0.795          |
| <b>NHS Cheshire and Merseyside</b>        | 0.72 (0.52 to 0.99) | 0.043          |
| <b>NHS Cumbria and North East</b>         | 2.57 (1.98 to 3.33) | <0.001         |
| <b>NHS Greater Manchester</b>             | 1.06 (0.8 to 1.39)  | 0.699          |
| <b>NHS Lancashire and South Cumbria</b>   | 1.21 (0.85 to 1.71) | 0.286          |
| <b>NHS Yorkshire and Humber</b>           | 1.9 (1.52 to 2.37)  | <0.001         |
| <b>NHS South Central</b>                  | 2.25 (1.73 to 2.93) | <0.001         |
| <b>NHS South East</b>                     | 1.78 (1.4 to 2.27)  | <0.001         |
| <b>NHS South West</b>                     | 2.3 (1.76 to 3.01)  | <0.001         |
| <b>NHS Wessex</b>                         | 2.24 (1.67 to 3.01) | <0.001         |
| <b>QoF preval serious conditions</b>      | 1.03 (1.03 to 1.04) | <0.001         |
| <b>Rurality</b>                           | 0.87 (0.74 to 1.02) | 0.082          |

**Supplementary Table 2. Distribution of emergency attendance and admissions per practice.**

|           |                |                                | Emergency attendances                 |               |                     | Emergency admissions |                   |
|-----------|----------------|--------------------------------|---------------------------------------|---------------|---------------------|----------------------|-------------------|
| Year      | Practices (=n) | Practices in the analysis (=n) | Practices with missing outcome, n (%) | Mean (SD)     | Median (IQR)        | Mean (SD)            | Median (IQR)      |
| 2009      | 7749           | 7709                           | 40 (0.52)                             | 17.44 (12.97) | 18.10 (3.81-26.62)  | 9.02 (2.65)          | 8.72 (7.36-10.37) |
| 2010      | 7841           | 7732                           | 109 (1.39)                            | 22.98 (11.43) | 22.89 (16.17-30.15) | 9.10 (2.60)          | 8.77 (7.43-10.48) |
| 2011      | 7895           | 7785                           | 110 (1.39)                            | 25.16 (10.41) | 24.22 (18.58-31.05) | 9.03 (2.70)          | 8.75 (7.35-10.37) |
| 2012      | 7907           | 7885                           | 22 (0.28)                             | 25.52 (9.28)  | 24.80 (19.24-31.13) | 9.06 (2.44)          | 8.83 (7.47-10.44) |
| 2013      | 7795           | 7778                           | 17 (0.22)                             | 25.60 (8.90)  | 24.74 (19.41-30.80) | 9.15 (2.46)          | 8.91 (7.54-10.54) |
| 2014      | 7619           | 7612                           | 7 (0.09)                              | 25.75 (8.79)  | 24.76 (19.59-31.05) | 9.33 (2.55)          | 9.15 (7.68-10.79) |
| 2015      | 7371           | 7368                           | 3 (0.04)                              | 26.32 (9.02)  | 25.40 (20.08-31.72) | 9.50 (2.47)          | 9.34 (7.88-10.97) |
| 2016      | 7175           | 7170                           | 5 (0.07)                              | 26.62 (8.91)  | 25.69 (20.46-31.83) | 9.54 (2.59)          | 9.37 (7.86-11.03) |
| 2017      | 6925           | 6919                           | 6 (0.09)                              | 26.57 (8.95)  | 25.56 (20.54-31.63) | 9.85 (2.67)          | 9.65 (8.16-11.31) |
| 2009-2017 |                |                                |                                       | 24.62 (10.34) | 24.28 (18.45-30.80) | 9.28 (2.58)          | 9.03 (7.61-10.71) |

**Supplementary Figure 2: Predicted probabilities from the multivariable analysis of the association between persistent high turnover and emergency attendances with an interaction between persistent high turnover and NHS region.**

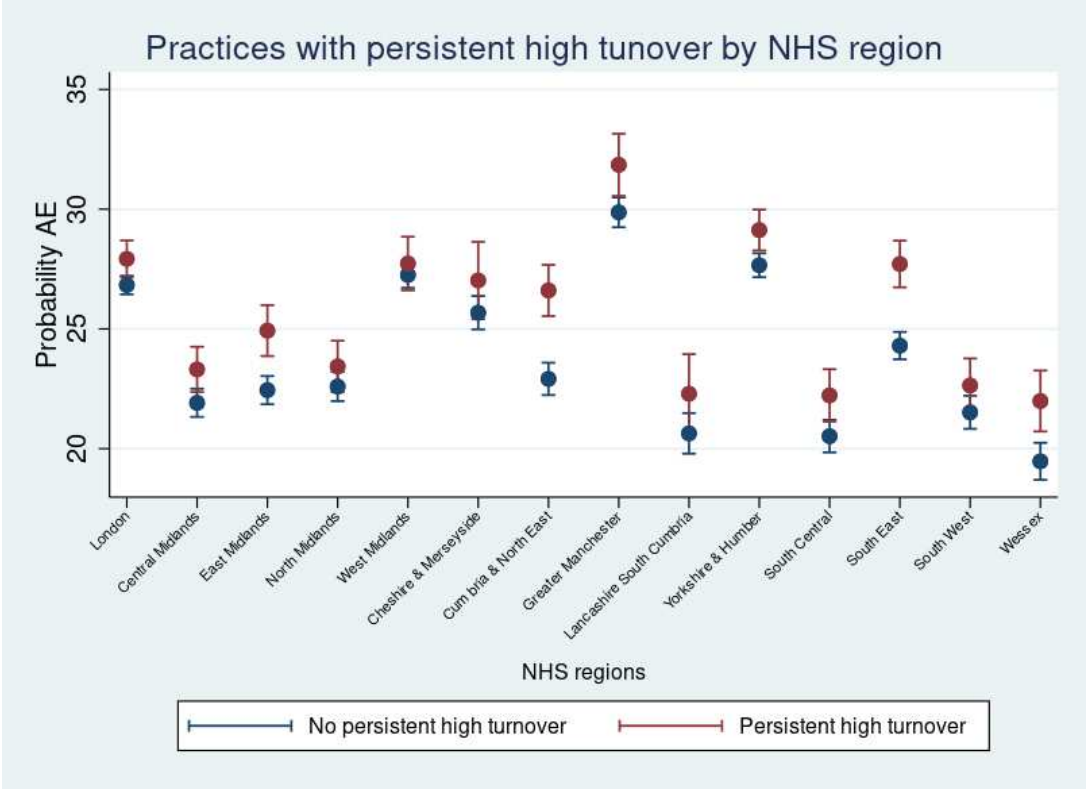

**Supplementary Figure 3: Predicted probabilities from the multivariable analysis of the association of persistent high turnover and emergency admissions with an interaction between persistent high turnover and social deprivation (IMD).**

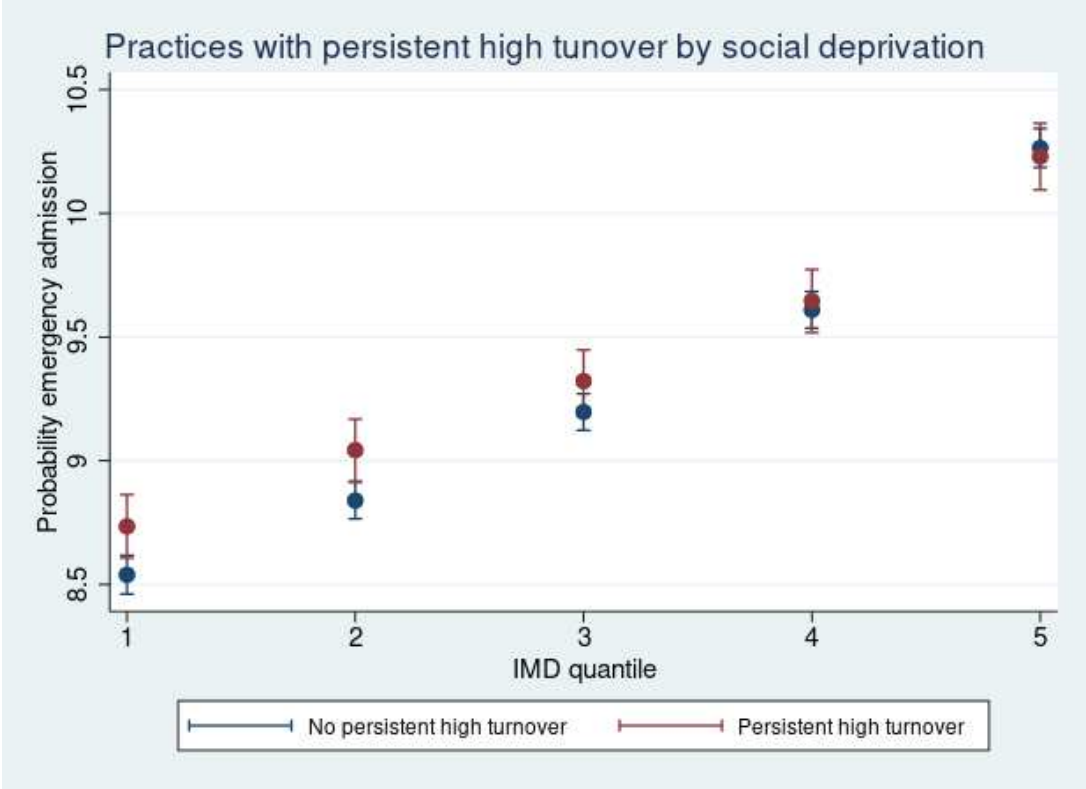

**Supplementary Table 3. Distribution of the outcome “Frequency of seeing preferred GPs ‘always or almost always’ or ‘a lot of times’”.**

| Year | Practices, n | Missing outcome (%) | Practices included, n | Mean (SD)     | Median (IQR)           |
|------|--------------|---------------------|-----------------------|---------------|------------------------|
| 2009 | 7749         | 268 (3.46)          | 7481                  | 72.51 (14.81) | 73.8 (62.92 to 83.54)  |
| 2010 | 7841         | 148 (1.89)          | 7693                  | 72.81 (14.39) | 74.08 (63.38 to 83.48) |
| 2011 | 7895         | 151 (1.91)          | 7744                  | 71.36 (15.2)  | 72.83 (61.25 to 82.67) |
| 2012 | 7907         | 361 (4.57)          | 7546                  | 65.99 (15.85) | 67.09 (55.44 to 77.9)  |
| 2013 | 7795         | 346 (4.44)          | 7449                  | 63.63 (16.63) | 64.64 (52.03 to 76.25) |
| 2014 | 7619         | 342 (4.49)          | 7277                  | 61.64 (17.12) | 62.14 (49.75 to 74.52) |
| 2015 | 7371         | 344 (4.67)          | 7027                  | 60.36 (16.94) | 61.23 (48.61 to 72.94) |
| 2016 | 7175         | 323 (4.5)           | 6852                  | 58.93 (17.1)  | 59.49 (46.94 to 71.39) |
| 2017 | 6925         | 315 (4.55)          | 6610                  | 56.09 (18.03) | 56.21 (43.14 to 69.39) |
|      |              |                     |                       | 65.08 (17.24) | 66.41 (53.28 to 78.07) |

**Supplementary Table 4. Distribution of the outcome “proportion of patients able to obtain an appointment on the same day”.**

| Year | Practices, n | Missing outcome (%) | Practices included, n | Mean (SD)     | Median (IQR)           |
|------|--------------|---------------------|-----------------------|---------------|------------------------|
| 2009 | 7749         | 9 (11.61)           | 7740                  | 80.33 (11.55) | 81.93 (73.33 to 89.02) |
| 2010 | 7841         | 12 (15.3)           | 7829                  | 80.26 (11.38) | 81.4 (73.04 to 88.8)   |
| 2011 | 7895         | 3 (3.8)             | 7892                  | 35.56 (14.26) | 33.35 (24.78 to 44.92) |
| 2012 | 7907         | 5 (6.32)            | 7902                  | 35.6 (14.17)  | 33.49 (24.94 to 44.93) |
| 2013 | 7795         | 4 (5.13)            | 7791                  | 35.88 (14.38) | 33.77 (25.09 to 45.27) |
| 2014 | 7619         | 4 (5.25)            | 7615                  | 36.38 (14.67) | 34.24 (25.54 to 45.82) |
| 2015 | 7371         | 1 (1.36)            | 7370                  | 36.7 (14.54)  | 34.98 (25.75 to 45.77) |
| 2016 | 7175         | 4 (5.58)            | 7171                  | 37.35 (14.48) | 35.54 (26.54 to 46.94) |
| 2017 | 6925         | 4 (5.78)            | 6921                  | 32.3 (13.92)  | 30.15 (21.95 to 41.53) |
|      |              |                     |                       | 45.88 (23.25) | 39.74 (27.51 to 62.13) |



**Supplementary Table 5. Distribution of the outcome “proportion of patients’ overall satisfaction with the practice”.**

| Year | Practices, n | Missing outcome (%) | Practices included, n | Mean (SD)     | Median (IQR)            |
|------|--------------|---------------------|-----------------------|---------------|-------------------------|
| 2009 | 7749         | 28 (0.36)           | 7721                  | 89.31 (7.38)  | 91.01 (85.85 to 94.56 ) |
| 2010 | 7841         | 94 (1.2)            | 7747                  | 82.68 (11.07) | 85.16 (76.69 to 90.86 ) |
| 2011 | 7895         | 45 (0.57)           | 7850                  | 88.67 (6.92)  | 90.14 (85.21 to 93.64 ) |
| 2012 | 7907         | 12 (0.15)           | 7895                  | 88.08 (7.66)  | 89.59 (84.15 to 93.65 ) |
| 2013 | 7795         | 14 (0.18)           | 7781                  | 86.64 (8.43)  | 88.26 (82.08 to 92.93 ) |
| 2014 | 7619         | 6 (0.08)            | 7613                  | 85.82 (8.81)  | 87.48 (80.92 to 92.34 ) |
| 2015 | 7371         | 0 (0)               | 7371                  | 84.96 (9.54)  | 86.69 (79.81 to 91.97 ) |
| 2016 | 7175         | 2 (0.03)            | 7173                  | 85.33 (9.18)  | 87.12 (80.42 to 92.17 ) |
| 2017 | 6925         | 2 (0.03)            | 6923                  | 85.13 (9.55)  | 86.91 (79.74 to 92.4 )  |
|      |              |                     |                       | 86.33 (9.01)  | 88.26 (81.66 to 92.91 ) |

**Supplementary Figure 4: Predicted probabilities from the multivariable analysis of the association of persistent high turnover and proportion of patients seeing their preferred doctor with an interaction between persistent high turnover and NHS region.**

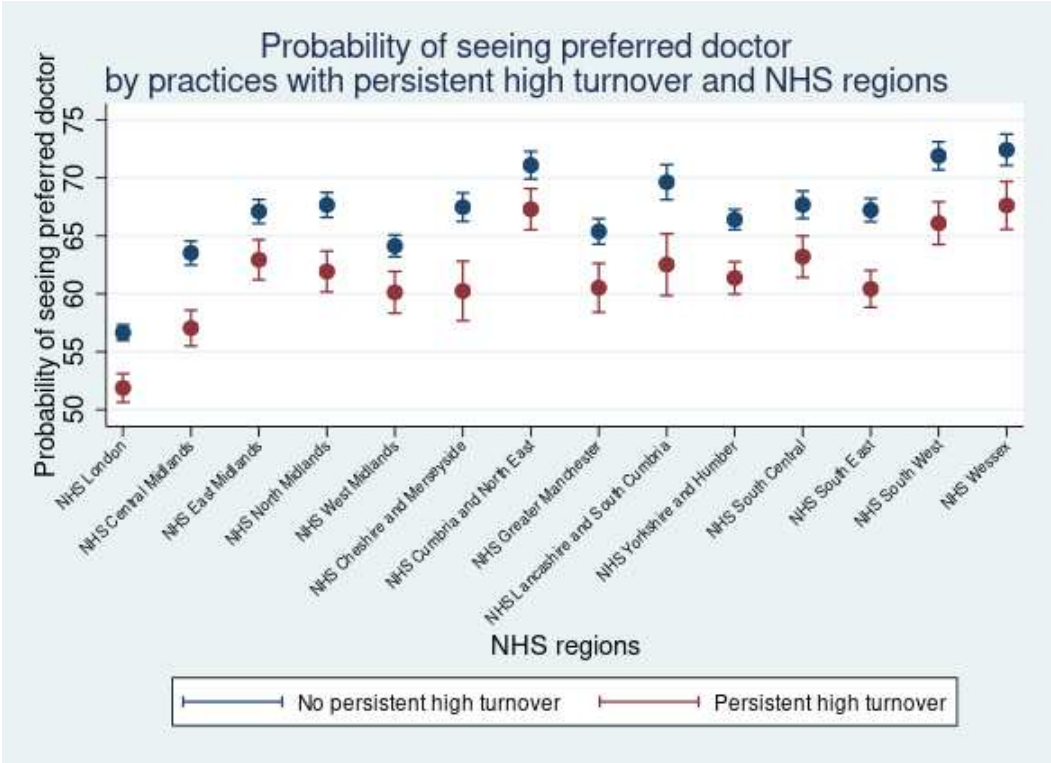

**Supplementary Figure 5: Predicted probabilities from the multivariable analysis of the association of persistent high turnover and proportion of patients seeing their preferred doctor with an interaction between persistent high turnover and social deprivation (IMD).**

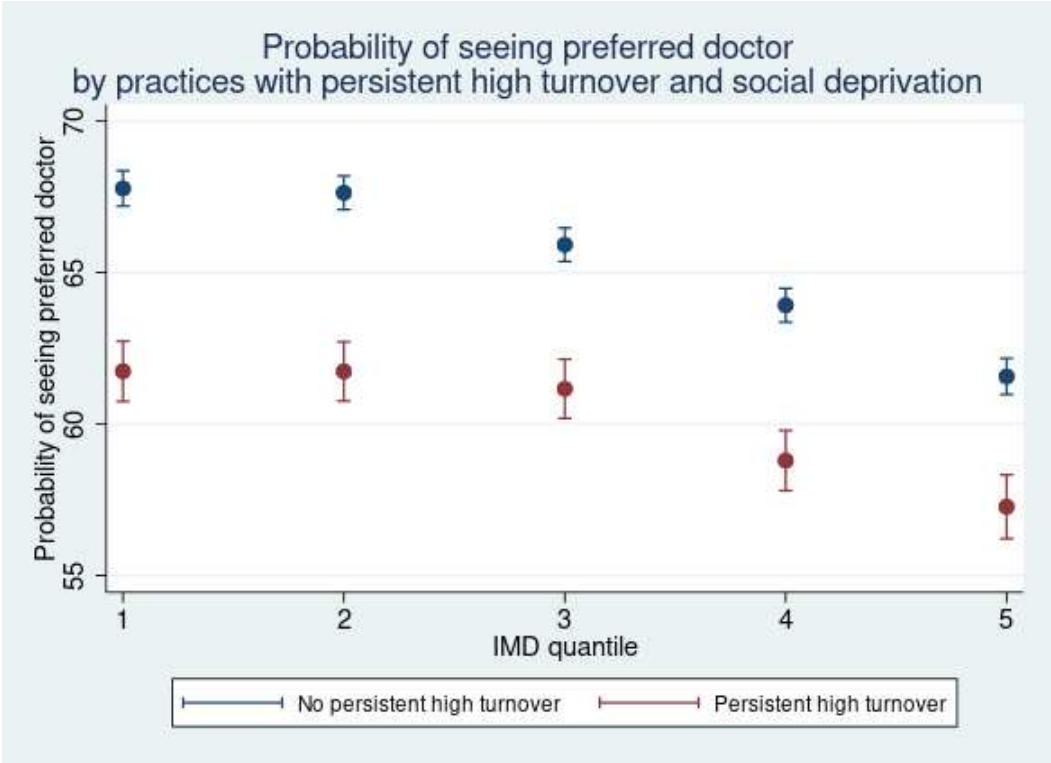

**Supplementary Figure 6: Predicted probabilities from the multivariable analysis of the association of persistent high turnover and proportion of patients getting an appointment on the same day with an interaction between persistent high turnover and listsize.**

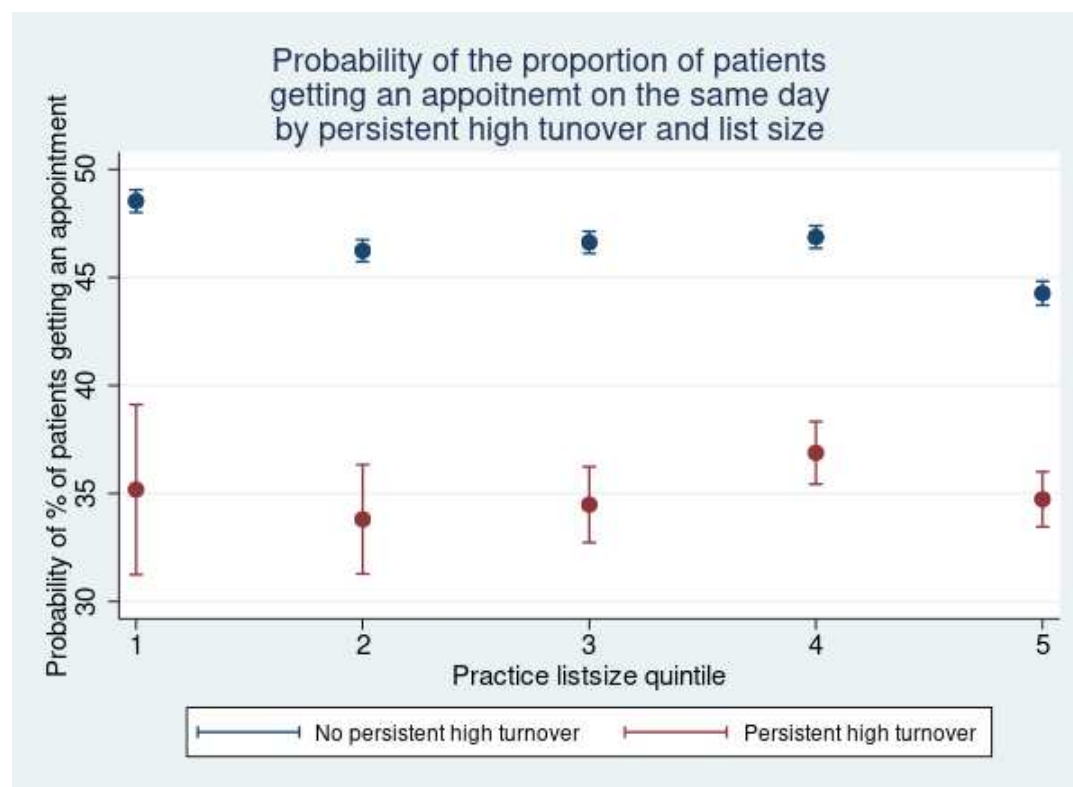

**Supplementary Figure 7: Predicted probabilities from the multivariable analysis of the association of persistent high turnover and proportion of patients getting an appointment on the same day with an interaction between persistent high turnover and social deprivation (IMD).**

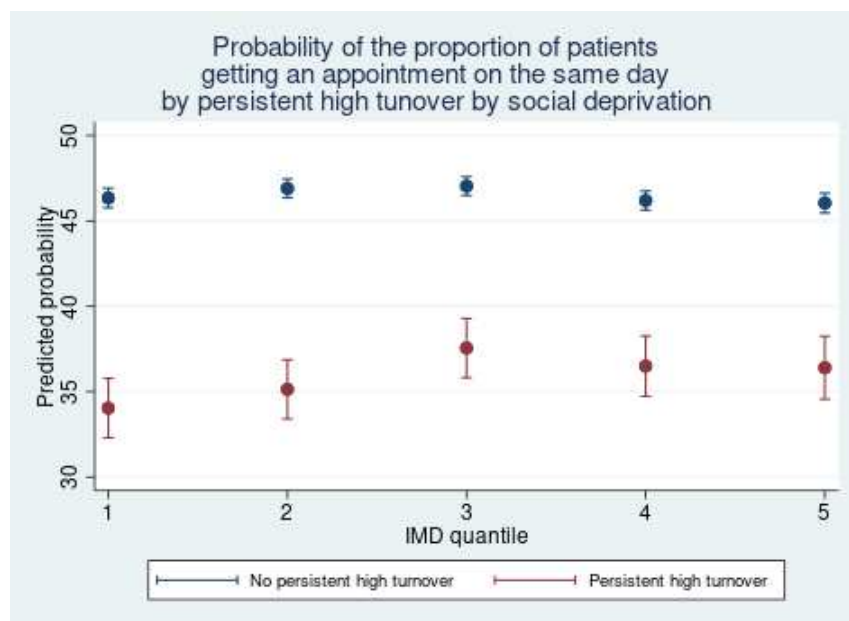

**Supplementary Figure 8: Predicted probabilities from the multivariable analysis of the association of persistent high turnover and proportion of patients overall satisfied with the practice with an interaction between persistent high turnover and social deprivation.**

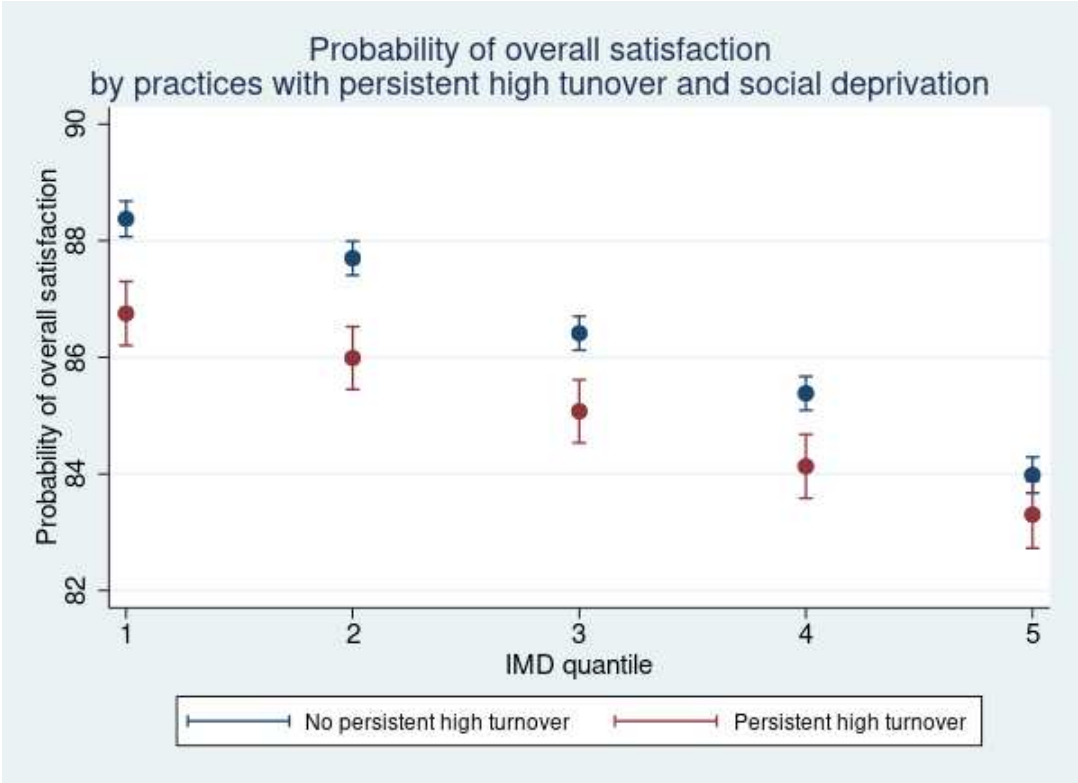

**Supplementary Figure 9: Predicted probabilities from the multivariable analysis of the association of persistent high turnover and proportion of patients overall satisfied with the practice with an interaction between persistent high turnover and listsize.**

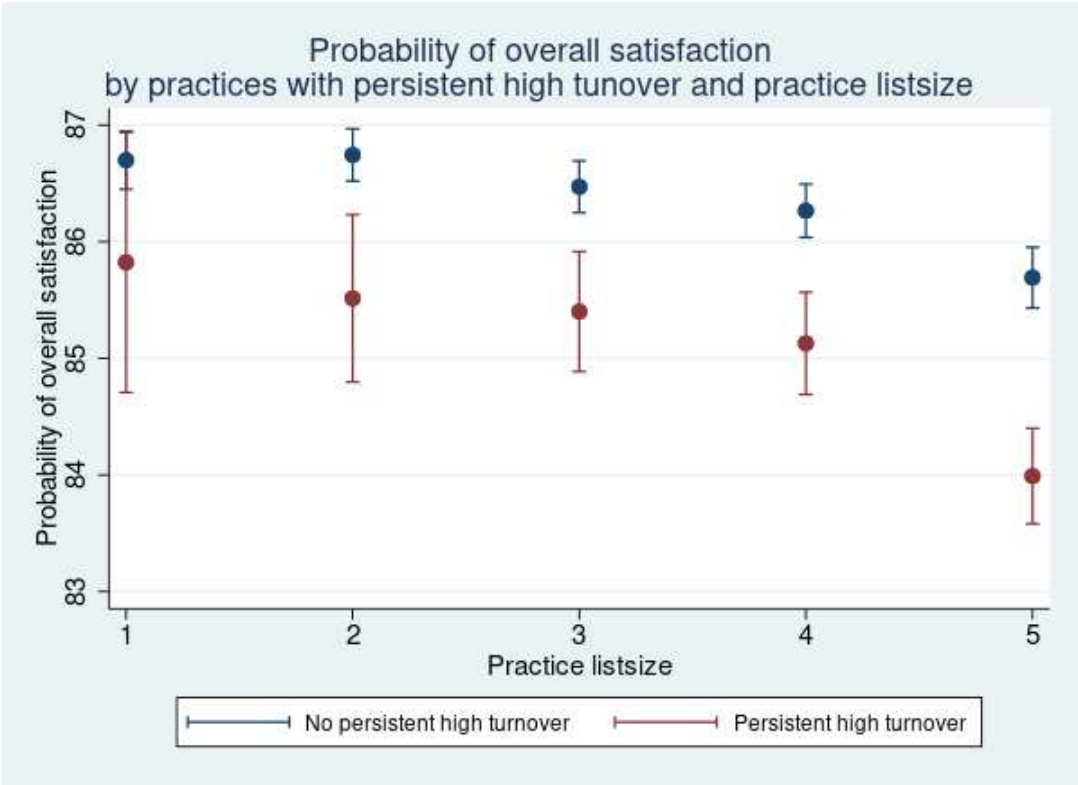

**Supplementary Table 6. Sensitivity analysis of the multivariable analysis of risk factors associated with persistent high turnover, restricting the analysis to 2015-2019 and including FTE per patients ratio in the model.**

|                                         | <b>OR (95% CIs)</b> | <b>p-value</b> |
|-----------------------------------------|---------------------|----------------|
| <b>FTE per pts ratio/1000</b>           | 0.43 (0.31 to 0.61) | <0.001         |
| <b>IMD 1</b>                            | Reference           |                |
| <b>IMD 2</b>                            | 1.21 (0.93 to 1.56) | 0.153          |
| <b>IMD 3</b>                            | 1.13 (0.87 to 1.47) | 0.368          |
| <b>IMD 4</b>                            | 1.24 (0.95 to 1.63) | 0.117          |
| <b>IMD 5</b>                            | 1.09 (0.81 to 1.45) | 0.578          |
| <b>Listsize 1 (2528; 592)</b>           | 0.07 (0.05 to 0.12) | <0.001         |
| <b>Listsize 2 (4493; 565)</b>           | 0.32 (0.24 to 0.42) | <0.001         |
| <b>Listsize 3 (6532; 649)</b>           | Reference           |                |
| <b>Listsize 4 (9119; 866)</b>           | 1.72 (1.39 to 2.13) | <0.001         |
| <b>Listsize 5 (14291; 4362)</b>         | 2.21 (1.78 to 2.75) | <0.001         |
| <b>NHS London</b>                       | Reference           |                |
| <b>NHS Central Midlands</b>             | 2.03 (1.4 to 2.94)  | <0.001         |
| <b>NHS East Midlands</b>                | 1.27 (0.85 to 1.9)  | 0.243          |
| <b>NHS North Midlands</b>               | 1.65 (1.1 to 2.49)  | 0.016          |
| <b>NHS West Midlands</b>                | 1.4 (0.95 to 2.08)  | 0.091          |
| <b>NHS Cheshire and Merseyside</b>      | 1.34 (0.83 to 2.16) | 0.228          |
| <b>NHS Cumbria and North East</b>       | 2.86 (1.87 to 4.38) | <0.001         |
| <b>NHS Greater Manchester</b>           | 1.76 (1.16 to 2.68) | 0.008          |
| <b>NHS Lancashire and South Cumbria</b> | 1.91 (1.12 to 3.25) | 0.017          |
| <b>NHS Yorkshire and Humber</b>         | 2.02 (1.41 to 2.88) | <0.001         |
| <b>NHS South Central</b>                | 2.52 (1.69 to 3.75) | <0.001         |
| <b>NHS South East</b>                   | 1.75 (1.2 to 2.55)  | 0.004          |
| <b>NHS South West</b>                   | 2.97 (1.95 to 4.5)  | <0.001         |
| <b>NHS Wessex</b>                       | 2.56 (1.65 to 3.97) | <0.001         |
| <b>QoF preval serious conditions</b>    | 1 (0.99 to 1.01)    | 0.818          |
| <b>Rurality</b>                         | 0.89 (0.68 to 1.15) | 0.369          |

**Supplementary Table 7. Sensitivity analysis of the association between persistent high turnover and emergency attendances. Multivariable analysis including GP turnover modelled as continuous variable.**

|                                         | <b>Coefficient (95% CIs)</b> | <b>p-value</b> |
|-----------------------------------------|------------------------------|----------------|
| <b>GP turnover %</b>                    | 0.01 (0 to 0.01)             | <0.001         |
| <b>IMD 1</b>                            | Reference                    |                |
| <b>IMD 2</b>                            | 0.93 (0.49 to 1.37)          | <0.001         |
| <b>IMD 3</b>                            | 2.36 (1.91 to 2.82)          | <0.001         |
| <b>IMD 4</b>                            | 4.86 (4.39 to 5.33)          | <0.001         |
| <b>IMD 5</b>                            | 7.96 (7.47 to 8.45)          | <0.001         |
| <b>Listsize 1 (2528; 592)</b>           | 0.12 (-0.23 to 0.46)         | 0.504          |
| <b>Listsize 2 (4493; 565)</b>           | 0.24 (-0.05 to 0.53)         | 0.105          |
| <b>Listsize 3 (6532; 649)</b>           | Reference                    |                |
| <b>Listsize 4 (9119; 866)</b>           | -0.31 (-0.6 to -0.02)        | 0.038          |
| <b>Listsize 5 (14291; 4362)</b>         | 0.46 (0.11 to 0.81)          | 0.010          |
| <b>NHS London</b>                       | Reference                    |                |
| <b>NHS Central Midlands</b>             | -4.92 (-5.62 to -4.22)       | <0.001         |
| <b>NHS East Midlands</b>                | -4.35 (-5.06 to -3.64)       | <0.001         |
| <b>NHS North Midlands</b>               | -4.28 (-5.01 to -3.55)       | <0.001         |
| <b>NHS West Midlands</b>                | 0.36 (-0.29 to 1.02)         | 0.278          |
| <b>NHS Cheshire and Merseyside</b>      | -1.21 (-2.01 to -0.4)        | 0.003          |
| <b>NHS Cumbria and North East</b>       | -3.75 (-4.54 to -2.96)       | <0.001         |
| <b>NHS Greater Manchester</b>           | 3.04 (2.31 to 3.77)          | <0.001         |
| <b>NHS Lancashire and South Cumbria</b> | -6.21 (-7.14 to -5.28)       | <0.001         |
| <b>NHS Yorkshire and Humber</b>         | 0.82 (0.18 to 1.45)          | 0.012          |
| <b>NHS South Central</b>                | -6.27 (-7.05 to -5.5)        | <0.001         |
| <b>NHS South East</b>                   | -2.41 (-3.1 to -1.72)        | <0.001         |
| <b>NHS South West</b>                   | -5.33 (-6.13 to -4.53)       | <0.001         |
| <b>NHS Wessex</b>                       | -7.29 (-8.15 to -6.43)       | <0.001         |
| <b>QoF preval serious conditions %</b>  | 0.17 (0.15 to 0.18)          | <0.001         |
| <b>Rurality</b>                         | -3.8 (-4.28 to -3.32)        | <0.001         |



**Supplementary Table 8. Sensitivity analysis of the association between persistent high turnover and emergency attendances restricting the analysis to 2015-2017 and including FTE per patients ratio.**

|                                            | <b>Coefficient (95% CIs)</b> | <b>p-value</b> |
|--------------------------------------------|------------------------------|----------------|
| <b>Persistent high turnover</b>            | 0.2 (-0.04 to 0.44)          | 0.106          |
| <b>FTE per pts ratio</b>                   | -0.68 (-1.07 to -0.29)       | 0.001          |
| <b>IMD 1</b>                               | Reference                    |                |
| <b>IMD 2</b>                               | 1.2 (0.72 to 1.68)           | <0.001         |
| <b>IMD 3</b>                               | 3.11 (2.61 to 3.6)           | <0.001         |
| <b>IMD 4</b>                               | 5.47 (4.96 to 5.98)          | <0.001         |
| <b>IMD 5</b>                               | 8.59 (8.05 to 9.12)          | <0.001         |
| <b>Listsize 1, mean; sd (2528; 592)</b>    | 0.16 (-0.25 to 0.58)         | 0.447          |
| <b>Listsize 2 (4493; 565)</b>              | 0.52 (0.19 to 0.84)          | 0.002          |
| <b>Listsize 3 (6532; 649)</b>              | Reference                    |                |
| <b>Listsize 4 (9119; 866)</b>              | -0.25 (-0.56 to 0.06)        | 0.113          |
| <b>Listsize 5 (14291; 4362)</b>            | -0.44 (-0.8 to -0.07)        | 0.02           |
| <b>NHS London</b>                          | Reference                    |                |
| <b>NHS Central Midlands</b>                | -1.88 (-2.6 to -1.16)        | <0.001         |
| <b>NHS East Midlands</b>                   | -0.26 (-0.99 to 0.48)        | 0.490          |
| <b>NHS North Midlands</b>                  | -2.69 (-3.45 to -1.93)       | <0.001         |
| <b>NHS West Midlands</b>                   | 1.52 (0.83 to 2.2)           | <0.001         |
| <b>NHS Cheshire and Merseyside</b>         | 1.17 (0.34 to 2)             | 0.006          |
| <b>NHS Cumbria and North East</b>          | 1.38 (0.56 to 2.2)           | 0.001          |
| <b>NHS Greater Manchester</b>              | 5.19 (4.44 to 5.94)          | <0.001         |
| <b>NHS Lancashire and South Cumbria</b>    | -2.71 (-3.69 to -1.73)       | <0.001         |
| <b>NHS Yorkshire and Humber</b>            | 2.53 (1.87 to 3.2)           | <0.001         |
| <b>NHS South Central</b>                   | -4.4 (-5.2 to -3.6)          | <0.001         |
| <b>NHS South East</b>                      | 1.43 (0.72 to 2.15)          | <0.001         |
| <b>NHS South West</b>                      | -3.37 (-4.21 to -2.54)       | <0.001         |
| <b>NHS Wessex</b>                          | -3.29 (-4.19 to -2.4)        | <0.001         |
| <b>QOF prevalence serious conditions %</b> | -0.02 (-0.04 to 0)           | 0.045          |
| <b>Rurality</b>                            | -3.39 (-3.88 to -2.89)       | <0.001         |

**Supplementary Table 9. Sensitivity analysis of the association between persistent high turnover and emergency admissions. Multivariable analysis including GP turnover modelled as continuous variable.**

|                                         | <b>Coef (95% CIs)</b>     | <b>p-value</b> |
|-----------------------------------------|---------------------------|----------------|
| <b>GP turnover %</b>                    | 0.001 (0 to 0.001)        | 0.004          |
| <b>IMD 1</b>                            | Reference                 |                |
| <b>IMD 2</b>                            | 0.302 (0.203 to 0.402)    | <0.001         |
| <b>IMD 3</b>                            | 0.654 (0.55 to 0.758)     | <0.001         |
| <b>IMD 4</b>                            | 1.062 (0.955 to 1.169)    | <0.001         |
| <b>IMD 5</b>                            | 1.715 (1.602 to 1.829)    | <0.001         |
| <b>Listsize 1 mean; sd (2528; 592)</b>  | 0.154 (0.08 to 0.227)     | <0.001         |
| <b>Listsize 2 (4493; 565)</b>           | 0.062 (0.003 to 0.122)    | 0.039          |
| <b>Listsize 3 (6532; 649)</b>           | Reference                 |                |
| <b>Listsize 4 (9119; 866)</b>           | -0.046 (-0.106 to 0.014)  | 0.132          |
| <b>Listsize 5 (14291; 4362)</b>         | 0.115 (0.041 to 0.189)    | 0.002          |
| <b>NHS London</b>                       | Reference                 |                |
| <b>NHS Central Midlands</b>             | 0.961 (0.794 to 1.129)    | <0.001         |
| <b>NHS East Midlands</b>                | 0.64 (0.471 to 0.81)      | <0.001         |
| <b>NHS North Midlands</b>               | 1.492 (1.318 to 1.665)    | <0.001         |
| <b>NHS West Midlands</b>                | 1.3 (1.143 to 1.457)      | <0.001         |
| <b>NHS Cheshire and Merseyside</b>      | 3.19 (2.999 to 3.381)     | <0.001         |
| <b>NHS Cumbria and North East</b>       | 2.56 (2.373 to 2.748)     | <0.001         |
| <b>NHS Greater Manchester</b>           | 2.331 (2.157 to 2.504)    | <0.001         |
| <b>NHS Lancashire and South Cumbria</b> | 2.171 (1.948 to 2.393)    | <0.001         |
| <b>NHS Yorkshire and Humber</b>         | 1.729 (1.578 to 1.88)     | <0.001         |
| <b>NHS South Central</b>                | 0.482 (0.297 to 0.667)    | <0.001         |
| <b>NHS South East</b>                   | 1.091 (0.927 to 1.255)    | <0.001         |
| <b>NHS South West</b>                   | 1.046 (0.856 to 1.237)    | <0.001         |
| <b>NHS Wessex</b>                       | 1.513 (1.307 to 1.719)    | <0.001         |
| <b>QoF preval serious conditions %</b>  | 0.094 (0.091 to 0.098)    | <0.001         |
| <b>Rurality</b>                         | -0.724 (-0.836 to -0.612) | <0.001         |

**Supplementary Table 10. Sensitivity analysis of the association between persistent high turnover and emergency admissions restricting the analysis to 2015-2017 and including FTE per patients ratio.**

|                                         | <b>Coefficient (95% CIs)</b> | <b>p-value</b> |
|-----------------------------------------|------------------------------|----------------|
| <b>Persistent high turnover</b>         | 0.12 (0.04 to 0.2)           | 0.004          |
| <b>FTE per pts ratio</b>                | 0.05 (-0.07 to 0.17)         | 0.416          |
| <b>IMD 1</b>                            | Reference                    |                |
| <b>IMD 2</b>                            | 0.36 (0.23 to 0.48)          | <0.001         |
| <b>IMD 3</b>                            | 0.71 (0.58 to 0.84)          | <0.001         |
| <b>IMD 4</b>                            | 1.13 (1 to 1.26)             | <0.001         |
| <b>IMD 5</b>                            | 1.86 (1.73 to 2)             | <0.001         |
| <b>Listsize 1</b>                       | -0.2 (-0.31 to -0.08)        | 0.001          |
| <b>Listsize 2</b>                       | -0.04 (-0.13 to 0.06)        | 0.447          |
| <b>Listsize 3</b>                       | Reference                    |                |
| <b>Listsize 4</b>                       | 0.05 (-0.04 to 0.15)         | 0.259          |
| <b>Listsize 5</b>                       | 0.07 (-0.03 to 0.17)         | 0.187          |
| <b>NHS London</b>                       | Reference                    |                |
| <b>NHS Central Midlands</b>             | 1.15 (0.97 to 1.34)          | <0.001         |
| <b>NHS East Midlands</b>                | 0.81 (0.62 to 0.99)          | <0.001         |
| <b>NHS North Midlands</b>               | 1.33 (1.14 to 1.52)          | <0.001         |
| <b>NHS West Midlands</b>                | 1.41 (1.23 to 1.58)          | <0.001         |
| <b>NHS Cheshire and Merseyside</b>      | 3.04 (2.83 to 3.25)          | <0.001         |
| <b>NHS Cumbria and North East</b>       | 2.12 (1.91 to 2.33)          | <0.001         |
| <b>NHS Greater Manchester</b>           | 1.75 (1.56 to 1.94)          | <0.001         |
| <b>NHS Lancashire and South Cumbria</b> | 1.69 (1.44 to 1.94)          | <0.001         |
| <b>NHS Yorkshire and Humber</b>         | 1.38 (1.22 to 1.55)          | <0.001         |
| <b>NHS South Central</b>                | 0.93 (0.73 to 1.14)          | <0.001         |
| <b>NHS South East</b>                   | 1.19 (1.01 to 1.37)          | <0.001         |
| <b>NHS South West</b>                   | 1.28 (1.07 to 1.49)          | <0.001         |
| <b>NHS Wessex</b>                       | 1.51 (1.29 to 1.74)          | <0.001         |
| <b>QoF preval serious conditions %</b>  | 0.13 (0.12 to 0.13)          | <0.001         |
| <b>Rurality</b>                         | -0.85 (-0.98 to -0.72)       | <0.001         |

**Supplementary Table 11. Sensitivity analysis of the association between persistent high turnover and GPPS outcomes. Multivariable analysis including GP turnover modelled as continuous variable.**

|                                    | Frequency seeing preferred doctor |         | Same day appointment      |         | Overall satisfaction         |         |
|------------------------------------|-----------------------------------|---------|---------------------------|---------|------------------------------|---------|
|                                    | Coefficient (95% CIs)             | p-value | Coefficient (95% CIs)     | p-value | Coefficient (95% CIs)        | p-value |
| <b>Turnov %</b>                    | -0.003 (-0.007 to 0.002)          | 0.251   | -0.037 (-0.046 to -0.029) | <0.001  | -0.0003 (-0.0027 to 0.0021)  | 0.831   |
| <b>IMD 1</b>                       | Reference                         |         | Reference                 |         |                              |         |
| <b>IMD 2</b>                       | -0.181 (-0.933 to 0.571)          | 0.636   | 0.541 (-0.225 to 1.307)   | 0.166   | -0.6958 (-1.0897 to -0.3018) | 0.001   |
| <b>IMD 3</b>                       | -1.819 (-2.603 to -1.035)         | <0.001  | 0.818 (0.038 to 1.598)    | 0.040   | -1.9635 (-2.3717 to -1.5553) | <0.001  |
| <b>IMD 4</b>                       | -3.832 (-4.639 to -3.026)         | <0.001  | -0.041 (-0.844 to 0.761)  | 0.919   | -2.9873 (-3.4071 to -2.5675) | <0.001  |
| <b>IMD 5</b>                       | -6.189 (-7.041 to -5.338)         | <0.001  | -0.213 (-1.047 to 0.621)  | 0.617   | -4.3807 (-4.822 to -3.9395)  | <0.001  |
| <b>Listsize 1</b>                  | 10.898 (10.322 to 11.473)         | <0.001  | 2.303 (1.584 to 3.021)    | <0.001  | 0.257 (-0.0486 to 0.5625)    | 0.099   |
| <b>Listsize 2</b>                  | 4.848 (4.384 to 5.313)            | <0.001  | -0.111 (-0.795 to 0.572)  | 0.750   | 0.2857 (0.0311 to 0.5403)    | 0.028   |
| <b>Listsize 3</b>                  | Reference                         |         | Reference                 |         |                              |         |
| <b>Listsize 4</b>                  | -4.37 (-4.836 to -3.904)          | <0.001  | 0.126 (-0.561 to 0.813)   | 0.720   | -0.2322 (-0.4887 to 0.0243)  | 0.076   |
| <b>Listsize 5</b>                  | -9.454 (-10.027 to -8.881)        | <0.001  | -2.699 (-3.431 to -1.967) | <0.001  | -0.9035 (-1.2143 to -0.5928) | <0.001  |
| <b>NHS London</b>                  | Reference                         |         | Reference                 |         |                              |         |
| <b>NHS Central Midlands</b>        | 6.709 (5.479 to 7.938)            | <0.001  | 10.6 (9.486 to 11.714)    | <0.001  | 3.6058 (2.9747 to 4.2368)    | <0.001  |
| <b>NHS East Midlands</b>           | 10.54 (9.29 to 11.789)            | <0.001  | 10.941 (9.807 to 12.075)  | <0.001  | 4.9656 (4.326 to 5.6052)     | <0.001  |
| <b>NHS North Midlands</b>          | 10.999 (9.721 to 12.278)          | <0.001  | 10.145 (8.981 to 11.31)   | <0.001  | 6.2033 (5.5491 to 6.8575)    | <0.001  |
| <b>NHS West Midlands</b>           | 7.595 (6.437 to 8.753)            | <0.001  | 7.555 (6.499 to 8.611)    | <0.001  | 3.8035 (3.2111 to 4.3959)    | <0.001  |
| <b>NHS Cheshire and Merseyside</b> | 10.917 (9.511 to 12.323)          | <0.001  | 12.749 (11.465 to 14.034) | <0.001  | 8.0122 (7.2904 to 8.7339)    | <0.001  |
| <b>NHS Cumbria and North East</b>  | 14.494 (13.108 to 15.88)          | <0.001  | 7.343 (6.072 to 8.614)    | <0.001  | 8.8155 (8.1061 to 9.5248)    | <0.001  |
| <b>NHS Greater Manchester</b>      | 8.786 (7.503 to 10.07)            | <0.001  | 3.369 (2.211 to 4.528)    | <0.001  | 5.8396 (5.1848 to 6.4945)    | <0.001  |

|                                         |                           |        |                           |        |                             |        |
|-----------------------------------------|---------------------------|--------|---------------------------|--------|-----------------------------|--------|
| <b>NHS Lancashire and South Cumbria</b> | 12.955 (11.297 to 14.613) | <0.001 | 8.531 (7.04 to 10.023)    | <0.001 | 6.5394 (5.6996 to 7.3792)   | <0.001 |
| <b>NHS Yorkshire and Humber</b>         | 9.755 (8.637 to 10.872)   | <0.001 | 9.185 (8.164 to 10.207)   | <0.001 | 6.0773 (5.5062 to 6.6485)   | <0.001 |
| <b>NHS South Central</b>                | 11.003 (9.644 to 12.362)  | <0.001 | 6.319 (5.086 to 7.552)    | <0.001 | 5.8909 (5.1929 to 6.5888)   | <0.001 |
| <b>NHS South East</b>                   | 10.44 (9.231 to 11.648)   | <0.001 | 10.349 (9.251 to 11.447)  | <0.001 | 4.4022 (3.7823 to 5.022)    | <0.001 |
| <b>NHS South West</b>                   | 15.171 (13.771 to 16.572) | <0.001 | 14.165 (12.885 to 15.444) | <0.001 | 8.4707 (7.7513 to 9.19)     | <0.001 |
| <b>NHS Wessex</b>                       | 15.777 (14.265 to 17.289) | <0.001 | 8.705 (7.326 to 10.083)   | <0.001 | 7.6787 (6.9009 to 8.4565)   | <0.001 |
| <b>QoF preval serious conditions %</b>  | -0.417 (-0.443 to -0.39)  | <0.001 | -0.407 (-0.439 to -0.374) | <0.001 | -0.0339 (-0.048 to -0.0198) | <0.001 |
| <b>Rurality</b>                         | 4.881 (4.049 to 5.712)    | <0.001 | 1.715 (0.943 to 2.487)    | <0.001 | 2.9275 (2.4998 to 3.3551)   | <0.001 |

**Supplementary Table 12. Sensitivity analysis of the association between persistent high turnover and GPPS outcomes. Multivariable analysis restricting the analysis to 2011-2017.**

|                                         | Frequency seeing preferred doctor |         | Same day appointment   |         | Overall satisfaction   |         |
|-----------------------------------------|-----------------------------------|---------|------------------------|---------|------------------------|---------|
|                                         | Coefficient (95% CIs)             | p-value | Coefficient (95% CIs)  | p-value | Coefficient (95% CIs)  | p-value |
| <b>Persistent high turnover</b>         | -2.03 (-2.43 to -1.62)            | <0.001  | 0.55 (0.25 to 0.86)    | <0.001  | -2.03 (-2.43 to -1.62) | <0.001  |
| <b>IMD 1</b>                            | Reference                         |         | Reference              |         | Reference              |         |
| <b>IMD 2</b>                            | -0.59 (-1.4 to 0.23)              | 0.159   | 0.69 (-0.05 to 1.43)   | 0.067   | -0.59 (-1.4 to 0.23)   | 0.159   |
| <b>IMD 3</b>                            | -2.22 (-3.07 to -1.37)            | <0.001  | 1.41 (0.64 to 2.19)    | <0.001  | -2.22 (-3.07 to -1.37) | <0.001  |
| <b>IMD 4</b>                            | -4.49 (-5.36 to -3.62)            | <0.001  | 0.67 (-0.12 to 1.47)   | 0.098   | -4.49 (-5.36 to -3.62) | <0.001  |
| <b>IMD 5</b>                            | -6.95 (-7.86 to -6.03)            | <0.001  | 1.71 (0.87 to 2.55)    | <0.001  | -6.95 (-7.86 to -6.03) | <0.001  |
| <b>Listsize 1</b>                       | 10.73 (10.08 to 11.37)            | <0.001  | -0.67 (-1.2 to -0.14)  | 0.013   | 10.73 (10.08 to 11.37) | <0.001  |
| <b>Listsize 2</b>                       | 4.75 (4.22 to 5.28)               | <0.001  | -0.65 (-1.08 to -0.22) | 0.003   | 4.75 (4.22 to 5.28)    | <0.001  |
| <b>Listsize 3</b>                       | Reference                         |         | Reference              |         | Reference              |         |
| <b>Listsize 4</b>                       | -4.11 (-4.63 to -3.59)            | <0.001  | 0.01 (-0.42 to 0.44)   | 0.961   | -4.11 (-4.63 to -3.59) | <0.001  |
| <b>Listsize 5</b>                       | -8.24 (-8.87 to -7.61)            | <0.001  | -0.06 (-0.59 to 0.48)  | 0.833   | -8.24 (-8.87 to -7.61) | <0.001  |
| <b>NHS London</b>                       | Reference                         |         | Reference              |         | Reference              |         |
| <b>NHS Central Midlands</b>             | 5.33 (4.04 to 6.61)               | <0.001  | 9.23 (8.01 to 10.46)   | <0.001  | 5.33 (4.04 to 6.61)    | <0.001  |
| <b>NHS East Midlands</b>                | 9.11 (7.81 to 10.42)              | <0.001  | 8.17 (6.93 to 9.42)    | <0.001  | 9.11 (7.81 to 10.42)   | <0.001  |
| <b>NHS North Midlands</b>               | 9.43 (8.09 to 10.77)              | <0.001  | 6.58 (5.31 to 7.85)    | <0.001  | 9.43 (8.09 to 10.77)   | <0.001  |
| <b>NHS West Midlands</b>                | 6.52 (5.31 to 7.74)               | <0.001  | 4.6 (3.45 to 5.75)     | <0.001  | 6.52 (5.31 to 7.74)    | <0.001  |
| <b>NHS Cheshire and Merseyside</b>      | 9.18 (7.7 to 10.65)               | <0.001  | 9.69 (8.29 to 11.1)    | <0.001  | 9.18 (7.7 to 10.65)    | <0.001  |
| <b>NHS Cumbria and North East</b>       | 12.61 (11.15 to 14.07)            | <0.001  | 1.73 (0.35 to 3.12)    | 0.014   | 12.61 (11.15 to 14.07) | <0.001  |
| <b>NHS Greater Manchester</b>           | 8.03 (6.68 to 9.37)               | <0.001  | 1.32 (0.04 to 2.59)    | 0.043   | 8.03 (6.68 to 9.37)    | <0.001  |
| <b>NHS Lancashire and South Cumbria</b> | 11.25 (9.52 to 12.99)             | <0.001  | 4.57 (2.94 to 6.21)    | <0.001  | 11.25 (9.52 to 12.99)  | <0.001  |
| <b>NHS Yorkshire and Humber</b>         | 8.39 (7.22 to 9.57)               | <0.001  | 6.22 (5.11 to 7.33)    | <0.001  | 8.39 (7.22 to 9.57)    | <0.001  |
| <b>NHS South Central</b>                | 10.23 (8.81 to 11.64)             | <0.001  | 4.11 (2.75 to 5.47)    | <0.001  | 10.23 (8.81 to 11.64)  | <0.001  |
| <b>NHS South East</b>                   | 9.33 (8.06 to 10.59)              | <0.001  | 8.22 (7.01 to 9.43)    | <0.001  | 9.33 (8.06 to 10.59)   | <0.001  |
| <b>NHS South West</b>                   | 13.74 (12.28 to 15.2)             | <0.001  | 10.51 (9.11 to 11.91)  | <0.001  | 13.74 (12.28 to 15.2)  | <0.001  |
| <b>NHS Wessex</b>                       | 14.52 (12.94 to 16.1)             | <0.001  | 4.52 (3.01 to 6.03)    | <0.001  | 14.52 (12.94 to 16.1)  | <0.001  |

|                                 |                       |        |                        |        |                       |        |
|---------------------------------|-----------------------|--------|------------------------|--------|-----------------------|--------|
| QoF preval serious conditions % | -0.26 (-0.3 to -0.23) | <0.001 | -0.06 (-0.08 to -0.03) | <0.001 | -0.26 (-0.3 to -0.23) | <0.001 |
| Rurality                        | 4.62 (3.75 to 5.5)    | <0.001 | 0.29 (-0.53 to 1.12)   | 0.483  | 4.62 (3.75 to 5.5)    | <0.001 |

**Supplementary Table 13. Sensitivity analysis of the association between persistent high turnover and GPPS outcomes. Multivariable analysis restricting the analysis to 2015-2017 and including FTE per patients ratio in the model.**

|                                         | Frequency seeing preferred doctor |         | Same day appointment    |         | Overall satisfaction   |         |
|-----------------------------------------|-----------------------------------|---------|-------------------------|---------|------------------------|---------|
|                                         | Coefficient (95% CIs)             | p-value | Coefficient (95% CIs)   | p-value | Coefficient (95% CIs)  | p-value |
| <b>Persistent high turnover</b>         | -1.58 (-2.28 to -0.87)            | <0.001  | 0.96 (0.37 to 1.55 )    | 0.001   | -0.5 (-0.89 to -0.11)  | 0.012   |
| <b>FTE per pts ratio</b>                | 2.43 (1.35 to 3.5)                | <0.001  | 1.96 (1.06 to 2.86 )    | <0.001  | 3.75 (3.18 to 4.32)    | <0.001  |
| <b>IMD 1</b>                            | Reference                         |         | Reference               |         | Reference              |         |
| <b>IMD 2</b>                            | -1.48 (-2.49 to -0.48)            | 0.004   | 0.74 (-0.17 to 1.65 )   | 0.113   | -1.04 (-1.59 to -0.5)  | <0.001  |
| <b>IMD 3</b>                            | -3.37 (-4.4 to -2.34)             | <0.001  | 1.89 (0.96 to 2.83 )    | <0.001  | -2.8 (-3.36 to -2.24)  | <0.001  |
| <b>IMD 4</b>                            | -5.73 (-6.79 to -4.67)            | <0.001  | 1.39 (0.43 to 2.35 )    | 0.005   | -3.81 (-4.38 to -3.24) | <0.001  |
| <b>IMD 5</b>                            | -8.06 (-9.17 to -6.95)            | <0.001  | 2.34 (1.34 to 3.34 )    | <0.001  | -5.87 (-6.46 to -5.27) | <0.001  |
| <b>Listsize 1</b>                       | 10.52 (9.5 to 11.55)              | <0.001  | -2.13 (-2.99 to -1.27 ) | <0.001  | 0.88 (0.36 to 1.41)    | 0.001   |
| <b>Listsize 2</b>                       | 5.14 (4.33 to 5.95)               | <0.001  | -0.93 (-1.64 to -0.22 ) | 0.010   | 0.56 (0.12 to 1)       | 0.013   |
| <b>Listsize 3</b>                       | Reference                         |         | Reference               |         | Reference              |         |
| <b>Listsize 4</b>                       | -4.55 (-5.33 to -3.77)            | <0.001  | 0.51 (-0.18 to 1.19 )   | 0.146   | -0.3 (-0.73 to 0.13)   | 0.172   |
| <b>Listsize 5</b>                       | -6.86 (-7.71 to -6)               | <0.001  | 0.03 (-0.73 to 0.79 )   | 0.944   | -0.53 (-1 to -0.06)    | 0.027   |
| <b>NHS London</b>                       | Reference                         |         | Reference               |         | Reference              |         |
| <b>NHS Central Midlands</b>             | 2.16 (0.69 to 3.63)               | 0.004   | 9.84 (8.51 to 11.18 )   | <0.001  | 2.42 (1.63 to 3.21)    | <0.001  |
| <b>NHS East Midlands</b>                | 5.83 (4.32 to 7.34)               | <0.001  | 8.74 (7.37 to 10.1 )    | <0.001  | 3.31 (2.5 to 4.12)     | <0.001  |
| <b>NHS North Midlands</b>               | 5.95 (4.4 to 7.5)                 | <0.001  | 6.99 (5.58 to 8.39 )    | <0.001  | 5.38 (4.54 to 6.21)    | <0.001  |
| <b>NHS West Midlands</b>                | 3.42 (1.99 to 4.84)               | <0.001  | 5.28 (4 to 6.55 )       | <0.001  | 2.95 (2.19 to 3.71)    | <0.001  |
| <b>NHS Cheshire and Merseyside</b>      | 5.36 (3.65 to 7.07)               | <0.001  | 10.42 (8.88 to 11.97 )  | <0.001  | 6.46 (5.55 to 7.38)    | <0.001  |
| <b>NHS Cumbria and North East</b>       | 8.02 (6.32 to 9.72)               | <0.001  | 2.08 (0.55 to 3.6 )     | 0.008   | 7.09 (6.18 to 7.99)    | <0.001  |
| <b>NHS Greater Manchester</b>           | 5.66 (4.1 to 7.22)                | <0.001  | 1.8 (0.41 to 3.19 )     | 0.011   | 5.44 (4.61 to 6.27)    | <0.001  |
| <b>NHS Lancashire and South Cumbria</b> | 6.41 (4.35 to 8.46)               | <0.001  | 4.54 (2.73 to 6.35 )    | <0.001  | 5.44 (4.36 to 6.52)    | <0.001  |
| <b>NHS Yorkshire and Humber</b>         | 4.79 (3.41 to 6.18)               | <0.001  | 6.86 (5.62 to 8.1 )     | <0.001  | 4.88 (4.15 to 5.62)    | <0.001  |
| <b>NHS South Central</b>                | 8.68 (7.05 to 10.3)               | <0.001  | 4.05 (2.56 to 5.54 )    | <0.001  | 4.9 (4.02 to 5.79)     | <0.001  |
| <b>NHS South East</b>                   | 6.91 (5.44 to 8.38)               | <0.001  | 8.19 (6.86 to 9.52 )    | <0.001  | 3.39 (2.6 to 4.18)     | <0.001  |
| <b>NHS South West</b>                   | 10.64 (8.93 to 12.34)             | <0.001  | 10.06 (8.51 to 11.61 )  | <0.001  | 7.42 (6.5 to 8.34)     | <0.001  |



|                                 |                       |        |                        |        |                     |        |
|---------------------------------|-----------------------|--------|------------------------|--------|---------------------|--------|
| NHS Wessex                      | 10.84 (9.02 to 12.66) | <0.001 | 3.91 (2.25 to 5.58 )   | <0.001 | 5.63 (4.64 to 6.62) | <0.001 |
| QoF preval serious conditions % | -0.03 (-0.07 to 0.02) | 0.252  | -0.01 (-0.05 to 0.02 ) | 0.464  | 0.04 (0.01 to 0.06) | 0.002  |
| Rurality                        | 4.61 (3.59 to 5.63)   | <0.001 | -0.22 -1.14 0.7        | 0.644  | 2.64 2.09 3.19      | <0.001 |

## References

1. NHS Digital. General Practice Workforce. <https://digital.nhs.uk/data-and-information/publications/statistical/general-and-personal-medical-services>.
2. Parisi R, et al. Rates of turnover among general practitioners: a retrospective study of all English general practices between 2007 and 2019. *BMJ Open* 2021;11(8):e049827. doi: 10.1136/bmjopen-2021-049827
3. NHS Digital TRUD. NHS ODS weekly prescribing-related data. <https://isd.digital.nhs.uk/trud3/user/guest/group/0/pack/5> [
4. NHS Digital. <https://digital.nhs.uk/data-and-information/data-tools-and-services/data-services/hospital-episode-statistics>.
5. Ipsos MORI. GP patient survey. practice data (weighted), 2009-2017. Available: <https://www.gp-patient.co.uk/surveysandreports-10-16> 2022 [2021].
